# Supplementary material for: Comparison of CRISPR and Marker-Based Methods for the Engineering of Phage T7
Source: PubMed Central journal article supplement (PMC7077284; doi:10.3390/v12020193), 2020-02-10
Supplement: viruses-12-00193-s001.pdf [file viruses-12-00193-s001.pdf]

**Table S1.** Bacterial strains used in this study.

| Strain /Phage                | Genotype                                                                                                                                                                    | Reference |
|------------------------------|-----------------------------------------------------------------------------------------------------------------------------------------------------------------------------|-----------|
| <i>E. coli</i> BW25113       | BW25113 lacI+rrnBT14 ΔlacZWJ16 hsdR 514 ΔaraBADAH33<br>ΔrhaBADLD78 rph-1 Δ(araB-D)567 Δ(rhaD-B)568 ΔlacZ4787(::rrnB-3) hsdR514 rph-1                                        | [1]       |
| <i>E. coli</i> MG1655        | K-12 F- λ- ilvG- rfb-50 rph-1                                                                                                                                               | [2]       |
| <i>E. coli</i> BW25113 ΔtrxA | F-, Δ(araDaraB) 567, ΔlacZ4787(::rrnB-3), λ-, rph-1, ΔtrxA732::kan, Δ(rhaDrhaB)568, hsdR514                                                                                 | [1]       |
| <i>E. coli</i> BW25113 Δcmk  | F-, Δ(araDaraB)567, ΔlacZ4787(::rrnB-3), λ-, Δcmk-734::kan, rph-1, Δ(rhaDrhaB)568, hsdR514                                                                                  | [1]       |
| <i>E. coli</i> BL21-AI       | BF- ompT gal dcm lon hsdSB(rB-mB-) [malB+]K-12(ΔS)                                                                                                                          | [3]       |
| BL21(DE3)                    | B F- ompT gal dcm lon hsdS <sub>B</sub> (r <sub>B</sub> -m <sub>B</sub> -) λ(DE3 [lacI lacUV5-T7p07 ind1 sam7 nin5]) [malB <sup>+</sup> ] <sub>K-12</sub> (Δ <sup>S</sup> ) | [4,5]     |

**Table S2.** Vectors used in this study.

| Vector  | Description Sequence/Relevant Information                                                                                                                                    | Source/Reference/Notes                                   |
|---------|------------------------------------------------------------------------------------------------------------------------------------------------------------------------------|----------------------------------------------------------|
| pWUR397 | Type I CRISPR - cas3 under T7 promoter, Kan <sup>R</sup>                                                                                                                     | [6]                                                      |
| pWUR400 | Type I cascade genes under T7 promoter, Str <sup>R</sup>                                                                                                                     | [6]                                                      |
| pAG_1   | pSMART, Amp <sup>R</sup> , with<br>TAATACGACTCACTATAGGGAGTTCCCCGCGCCAGCGGGGATAAAC<br>CGTGGTCTTCGACCAGTCTCGGAAGCTCAAAGGTCTGAAGACCAGA<br>GTTCCCCGCGCCAGCGGGGGCTAGTTATGCTCAGCGG | This study/used as gRNA <sub>scr</sub> for type I CRISPR |
| pAG_2   | pAG1 with gRNA TCCTTACGATTAATACAGACTATCGCTTTGCT                                                                                                                              | This study/ used as gRNA1 for type I CRISPR              |
| pAG_3   | pAG1 with gRNA AAATATTCACGCTAACGGGCGCCTTTACATGA                                                                                                                              | This study/used as gRNA2 for type I CRISPR               |
| pAG_4   | pAG1 with gRNA CGGTAACATCCAGTTAGTAGTAAACGGACAGA                                                                                                                              | This study/used as gRNA3 for type I CRISPR               |
| pAG_5   | pAG1 with gRNA TTACTIONGACGTAACCTCGATGGTCTGTAGCCA                                                                                                                            | This study/ used as gRNA4 for type I CRISPR              |
| pAG_6   | pAG1 with gRNA TACAGTCATTGTTGTTATCTGACCCTCTACCA                                                                                                                              | This study/used as gRNA5 for type I CRISPR               |
| pAG_7   | pAG1 with gRNA CGTGGACTCAGGTGTGGTCTGGTAGTGCTGGC                                                                                                                              | This study/used as gRNA6 for type I CRISPR               |

|               |                                                                                            |                                                          |
|---------------|--------------------------------------------------------------------------------------------|----------------------------------------------------------|
| <b>pAG_8</b>  | pAG1 with gRNA TGTGGTCTGGTAGTGCTGGCGGTGGGGTAAGT                                            | This study/ used as gRNA7 for type I CRISPR              |
| <b>pAG_9</b>  | pAG1 with gRNA ATCTCCGCTTCCGCAATATCTGGATTAAGTGT                                            | This study/ used as gRNA8 for type I CRISPR              |
| <b>pAG_10</b> | pAG1 with gRNA CTATGAAGTAGATTCCATCGGGGCCAGTACGG                                            | This study/ used as gRNA9 for type I CRISPR              |
| <b>pAG_11</b> | pAG1 with gRNA TACTGAACGACTGTCTGCAATATTCTTGAATC                                            | This study/ used as gRNA10 for type I CRISPR             |
| <b>pCas_9</b> | Cmp <sup>R</sup> , with tgagaccagtctcggaagctcaaaggtctc                                     | [61]/used as gRNA <sub>scr</sub> for type II CRISPR      |
| <b>pAG_12</b> | pCas_9 with gRNA AAGTGTGACTGTTTCACAGG                                                      | This study/ This study/ used as gRNA1 for type II CRISPR |
| <b>pAG_13</b> | pCas_9 with gRNA AGGCGTGGACTCAGGTGTGG                                                      | This study/ used as gRNA2 for type II CRISPR             |
| <b>pAG_14</b> | pCas_9 with gRNA AGTGTGCCAACAACTCTTGG                                                      | This study/ used as gRNA3 for type II CRISPR             |
| <b>pAG_15</b> | pCas_9 with gRNA TTCCGCTGCGCATCAATCTG                                                      | This study/ used as gRNA4 for type II CRISPR             |
| <b>pAG_16</b> | pCas_9 with gRNA ACGCTACGAACACAAAGCAG                                                      | This study/ used as gRNA5 for type II CRISPR             |
| <b>pAG_17</b> | pCas_9 with gRNA CAGCATCCGCTAACTCTGCTC                                                     | This study/ used as gRNA6 for type II CRISPR             |
| <b>pAG_18</b> | pCas_9 with gRNA TACAGTTCGGTAATGAGGCT                                                      | This study/ used as gRNA7 for type II CRISPR             |
| <b>pAG_19</b> | pCas_9 with gRNA GGTAAGTGTGACTGTTTCAC                                                      | This study/ used as gRNA8 for type II CRISPR             |
| <b>pAG_20</b> | pCas_9 with gRNA GATCTCCGCTTCCGCAATAT                                                      | This study/ used as gRNA9 for type II CRISPR             |
| <b>pAG_21</b> | pCas_9 with gRNA CTCCGCAATATCTGGATTA                                                       | This study/ used as gRNA10 for type II CRISPR            |
| <b>pAG_22</b> | pCas_9 with gRNA AATACACTCCAACGGTCTCG                                                      | This study/ used as gRNA11 for type II CRISPR            |
| <b>pSB6A1</b> | Amp <sup>R</sup>                                                                           | Registry of Standard Biological parts                    |
| <b>pAG_23</b> | pSB6A1 with HR1*, 513-1146 ( <i>mtd</i> ), RBS (B0034), <i>trxA</i> (full sequence), HR2** | This study                                               |
| <b>pAG_24</b> | pSB6A1 with HR1*, 513-1146 ( <i>mtd</i> ), RBS (B0034), <i>trxA</i> (full sequence), HR2** | This study                                               |
| <b>pAG_25</b> | pSB6A1 with HR1*, 513-1146 ( <i>mtd</i> ), RBS (B0034), <i>trxA</i> (full sequence), HR2** | This study                                               |
| <b>pAG_26</b> | pSB6A1 with HR1*, 513-1146 ( <i>mtd</i> ), RBS (B0034), <i>trxA</i> (full sequence), HR2** | This study                                               |

|               |                                                                                                                          |            |
|---------------|--------------------------------------------------------------------------------------------------------------------------|------------|
| <b>pAG_27</b> | pSB6A1 with HR1*, 513-1146 ( <i>mtd</i> ), RBS ( <i>B0034</i> ), <i>trxA</i> (full sequence), HR2**                      | This study |
| <b>pAG_28</b> | pSB6A1 with HR1*, 513-1146 ( <i>mtd</i> ), RBS ( <i>B0034</i> ), <i>trxA</i> (full sequence), HR2**                      | This study |
| <b>pAG_29</b> | pSB6A1 with HR1*, 513-1146 ( <i>mtd</i> ), RBS ( <i>B0034</i> ), <i>trxA</i> (full sequence), HR2**                      | This study |
| <b>pAG_30</b> | pSB6A1 with full <i>g17</i> under T7 promoter                                                                            | This study |
| <b>pAG_31</b> | pSEVA551 with codon optimised full <i>g17</i> under T7 promoter                                                          | This study |
| <b>pAG_32</b> | pSB6A1 with HR1*, 1455-1707<br>( <i>Yep-phi</i> , <i>g17</i> ), RBS ( <i>B0034</i> ), <i>trxA</i> (full sequence), HR2** | This study |

HR1\* gccggtgtggccactgatggtaatattcaaggtactaagtggggaggtaaaggctggatgcttacctacgtgacagcttcgttcgaag

HR2\*\* ttgtaaatcacaaggaagacgtgtagctccacggatggactctcaaggaggtacaaggtgctatcattagactttaacaacgaattgat

**Table S3.** Primers used in this study.

| Primer Sequence 5' to 3'               | Use                                          |
|----------------------------------------|----------------------------------------------|
| ACCGTCCTTACGATTAATACAGACTATCGCTTTGCT   | Forward primer to generate insert for pAG_2  |
| ACTCAGCAAAGCGATAGTCTGTATTAATCGTAAGGA   | Reverse primer to generate insert for pAG_2  |
| ACCGAAATATTCACGCTAACGGGCGCCTTTACATGA   | Forward primer to generate insert for pAG_3  |
| ACTCTCATGTAAAGGCGCCCGTTAGCGTGAATATTT   | Reverse primer to generate insert for pAG_3  |
| ACCGCGGTAACATCCAGTTAGTAGTAAACGGACAGA   | Forward primer to generate insert for pAG_4  |
| ACTCTCTGTCCGTTTACTACTAACTGGATGTTACCG   | Reverse primer to generate insert for pAG_4  |
| ACCGTTACTCGACGTAACCTCGATGGTCGTGTAGCCA  | Forward primer to generate insert for pAG_5  |
| ACTCTGGCTACACGACCATCGAGTTACGTCGAGTAA   | Reverse primer to generate insert for pAG_5  |
| ACCGTACAGTCATTGTTGTTATCTGACCCCTTACCA   | Forward primer to generate insert for pAG_6  |
| ACTCTGGTAGAGGGTCAGATAACAACAATGACTGTA   | Reverse primer to generate insert for pAG_6  |
| ACCGCGTGGACTCAGGTGTGGTCTGGTAGTGCTGGC   | Forward primer to generate insert for pAG_7  |
| ACTCGCCAGCACTACCAGACCACACCTGAGTCCACG   | Reverse primer to generate insert for pAG_7  |
| ACCGTGTGGTCTGGTAGTGCTGGCGGTGGGGTAAGT   | Forward primer to generate insert for pAG_8  |
| ACTCACTTACCCACCGCCAGCACTACCAGACCACA    | Reverse primer to generate insert for pAG_8  |
| ACCGATCTCCGCTCCGCAATATCTGGATTAAGTGT    | Forward primer to generate insert for pAG_9  |
| ACTCACACTTAATCCAGATATTGCGGAAGCGGAGAT   | Reverse primer to generate insert for pAG_9  |
| ACCGCTATGAAGTAGATTCCATCGGGGCCAGTACGG   | Forward primer to generate insert for pAG_10 |
| ACTCCCGTACTGGCCCCGATGGAATCTACTTCATAG   | Reverse primer to generate insert for pAG_10 |
| ACCGTACTGAACGACTGTCTGCAATATTCTTGAATC   | Forward primer to generate insert for pAG_11 |
| ACTCGATTCAAGAATATTGCAGACAGTCGTTTACAGTA | Reverse primer to generate insert for pAG_11 |
| AAACAAGTGTGACTGTTTCACAGG               | Forward primer to generate insert for pAG_12 |

---

|                                                |                                                                  |
|------------------------------------------------|------------------------------------------------------------------|
| AAAACCTGTGAAACAGTCACACTT                       | Reverse primer to generate insert for pAG_12                     |
| AAACAGGCGTGGACTCAGGTGTGG                       | Forward primer to generate insert for pAG_13                     |
| AAAACACACCTGAGTCCACGCCT                        | Reverse primer to generate insert for pAG_13                     |
| AAACAGTGTGCCAACAACTCTTGG                       | Forward primer to generate insert for pAG_14                     |
| AAAACCAAGAGTTGTTGGCACACT                       | Reverse primer to generate insert for pAG_14                     |
| AAACGTTCCGCTGCGCATCAATCTG                      | Forward primer to generate insert for pAG_15                     |
| AAAACAGATTGATGCGCAGCGGAAC                      | Reverse primer to generate insert for pAG_15                     |
| AAACGACGCTACGAACACAAAGCAG                      | Forward primer to generate insert for pAG_16                     |
| AAAACCTGCTTTGTGTTTCGTAGCGTC                    | Reverse primer to generate insert for pAG_16                     |
| AAACGAGCAGAGTTAGCGGATGCTG                      | Forward primer to generate insert for pAG_17                     |
| AAAACAGCATCCGCTAACTCTGCTC                      | Reverse primer to generate insert for pAG_17                     |
| AAACGAGCCTCATTACGGAAGTGTGTA                    | Forward primer to generate insert for pAG_18                     |
| AAAATACAGTTCCGTAATGAGGCTC                      | Reverse primer to generate insert for pAG_18                     |
| AAACGGTAAGTGTGACTGTTTCAC                       | Forward primer to generate insert for pAG_19                     |
| AAAAGTGAAACAGTCACACTTACC                       | Reverse primer to generate insert for pAG_19                     |
| AAACGATCTCCGCTTCCGCAATATC                      | Forward primer to generate insert for pAG_20                     |
| AAAAGATATTGCGGAAGCGGAGATC                      | Reverse primer to generate insert for pAG_20                     |
| AAACGTAATCCAGATATTGCGGAAG                      | Forward primer to generate insert for pAG_21                     |
| AAAACCTCCGCAATATCTGGATTAC                      | Reverse primer to generate insert for pAG_21                     |
| AAACGCGAGACCGTTGGAGTGTATT                      | Forward primer to generate insert for pAG_22                     |
| AAAAAATACACTCCAACGGTCTCGC                      | Reverse primer to generate insert for pAG_22                     |
| <br>                                           |                                                                  |
| GTGACAGCTTCGTTGCGAAGATCAAGTTTCGCCCGGCTGC       | For pAG_26 construct Gibson assembly; <i>mtd</i> g-block forward |
| TGACCTCCTTAAAGTAAATCACAAAAACCCCTAGCCGCC        | <i>mtd</i> g-block reverse                                       |
| ACGCCAACCTGGCTTAATGATTGGTAAATCACAAAGGAAAAGACG  | pSB6A1 (Yep-phi) <i>p17g</i> -block g-block forward              |
| GCAGCCGGGCGAAACTTGATCTTCGCAACGAAGCTGTAC        | pSB6A1 (Yep-phi) <i>p17g</i> -block g-block reverse              |
| GGCGGCTAGGGGTTTTTTGTGATTTACTTTAAGGAGGTCAAATGAG | <i>trxA</i> g-block forward                                      |
| CTTTCCTTGTGATTTACCAATCATTAAAGCCAGGTTGGCGT      | <i>trxA</i> g block reverse                                      |

---

---

|                                                       |                                                                         |
|-------------------------------------------------------|-------------------------------------------------------------------------|
| GTGACAGCTTCGTTGCGAAGAACGAATACAGCCTGTGGGA              | For pAG_25 construct<br>Gibson assembly; <i>mtd</i> g-<br>block forward |
| TGACCTCCTTAAAGTAAATCACAAAAAACCCCTAGCCGCC              | <i>mtd</i> g-block reverse                                              |
| ACGCCAACCTGGCTTAATGATTGGTAAATCACAAAGGAAAGACG          | pSB6A1 (Yep-phi) <i>p17g</i> -<br>block g-block forward                 |
| TCCCACAGGCTGTATTCGTTCTTCGCAACGAAGCTGTCAC              | pSB6A1 (Yep-phi) <i>p17g</i> -<br>block g-block reverse                 |
| GGCGGCTAGGGGTTTTTTGTGATTTACTTTAAGGAGGTCAAATGAG        | <i>trxA</i> g-block forward                                             |
| CTTTCCTTGTGATTTACCAATCATTAAAGCCAGGTTGGCGT             | <i>trxA</i> g-block reverse                                             |
|                                                       |                                                                         |
| GTGACAGCTTCGTTGCGAAGAACGAATACAGCCTGTGGGA              | For pAG_24 construct<br>Gibson assembly; <i>mtd</i> g-<br>block forward |
| TGACCTCCTTAAAGTAAATCACAAAAAACCCCTAGCCGCC              | to amplify <i>mtd</i> g-block<br>reverse                                |
| ACGCCAACCTGGCTTAATGATTGGTAAATCACAAAGGAAAGACG          | pSB6A1 (Yep-phi) <i>p17g</i> -<br>block g-block forward                 |
| TCGGCCTTGATGAAAGCCGCTTCGCAACGAAGCTGTCAC               | pSB6A1 (Yep-phi) <i>p17g</i> -<br>block g-block reverse                 |
| GGCGGCTAGGGGTTTTTTGTGATTTACTTTAAGGAGGTCAAATGAG        | <i>trxA</i> g-block forward                                             |
| CTTTCCTTGTGATTTACCAATCATTAAAGCCAGGTTGGCGT             | <i>trxA</i> g-block reverse                                             |
|                                                       |                                                                         |
| ACCACCTGATTCTTGAGTAGCGGGGCCGAAAGGCCCCCGCC             | For pAG_27 construct<br>Gibson assembly; pAG_24<br>forward              |
| ACCAGATCGTGCCGCGCCAGCTTCGCAACGAAGCTGTACGTAGGTA<br>AGC | pAG24 reverse                                                           |
| GTGACAGCTTCGTTGCGAAGCTGGCGCGGCACGATCTGGT              | <i>mtd</i> g-block forward                                              |
| GGCGGGCCTTTCGGCCCCGCTACTCAAGAATCAGGTGGTCACAGAC<br>G   | <i>mtd</i> g-block reverse                                              |
|                                                       |                                                                         |
| GTGACAGCTTCGTTGCGAAGAAGTTTCGCCCGGCTGCGCT              | For pAG_23 construct<br>assembly; <i>mtd</i> g-block<br>forward         |
| TGACCTCCTTAAAGTAAATCCGGTTGCCTTGGCGGGCCT               | <i>mtd</i> g-block reverse                                              |
| ACGCCAACCTGGCTTAATGATTGGTAAATCACAAAGGAAAGACG          | pSB6A1 (Yep-phi) <i>p17g</i> -<br>block g-block forward                 |
| AGCGCAGCCGGGCGAAACTTCTTCGCAACGAAGCTGTCAC              | pSB6A1 (Yep-phi) <i>p17g</i> -<br>block g-block reverse                 |
| AGCCCCGCCAAGGCAACCGGATTTACTTTAAGGAGGTCAAATGAG         | <i>trxA</i> g-block forward                                             |
| CTTTCCTTGTGATTTACCAATCATTAAAGCCAGGTTGGCGT             | <i>trxA</i> g-block reverse                                             |
|                                                       |                                                                         |
| ACCACCTGATTCTTGAGTAGCGGGGCCGAAAGGCCCCCGCC             | For pAG_28 construct<br>Gibson assembly; pAG_24<br>forward              |

---

---

|                                                                                  |                                                          |
|----------------------------------------------------------------------------------|----------------------------------------------------------|
| ATGAAAGCCGTTTTACCAGCTTCGCAACGAAGCTGTCACGTAGGTA<br>AGC                            | pAG_24 reverse                                           |
| GTGACAGCTTCGTTGCGAAGCTGGTGAAAACGGCTTTCAT                                         | <i>mtd</i> g-block forward                               |
| GGCGGGGCCTTTCGGCCCCGCTACTCAAGAATCAGGTGGT                                         | <i>mtd</i> g-block reverse                               |
| GGCCCTTTCGTCTTCAAGAATGTAACTTGAGGGAGCGTA                                          | <i>trxA</i> g-block forward                              |
| CACGATGCGTCCGGCGTAGATCAAATCAATTCGTTGTAAAGTC                                      | <i>trxA</i> g-block reverse                              |
| TTAACAACGAATTGATTTGATCTACGCCGGACGCATCGTG                                         | pSB6A1 forward                                           |
| ACGCTCCCTCAAGTTAACATTCTTGAAGACGAAAGGGCCTC                                        | pSB6A1 reverse                                           |
| GGCCTGCAGGAGTCACTACTAGTAGCGGCCGCTG                                               | Gibson primers to generate<br>pAG_32                     |
| CGCCGCGCGCCCCGAAGTTAGTTTCGAACTAAGATTGTC                                          |                                                          |
| TCTTAGTTCGAAACTAACTTCGGGGCGCGCGGCG                                               |                                                          |
| CAGCGGCCGCTACTAGTAGTACTCCTGCAGGCCTTAATCAATT<br>CGTTGTT                           |                                                          |
| TGGACTCACAAAGAAAAACGCCCGGTGTGCAAGACCGAGCGTTCT<br>GAACAATTACTCGTTCTCCACCATGATTGC  | Gibson primers to generate<br>pAG_30, <i>g17</i> forward |
| CTCACTATAGGGAGAACTAGAGAAAGAGGAGAAATACTAGATGGCT<br>AACGTAATTAACCGTTTTGAC          | <i>g17</i> reverse                                       |
| GTCAAAACGGTTTTAATTACGTTAGCCATCTAGTATTTCTCCTTTTCT<br>CTAGTTCTCCCTATAGTGAG         | pSB6A1 forward                                           |
| GCAATCATGGTGGAGAACGAGTAATTGTTTCAGAACGCTCGGTCTTGC<br>ACACCGGGCGTTTTTCTTTGTGAGTCCA | pSB6A1 reverse                                           |
| TCGGCTGGCTTTGTGGCTAACG                                                           | T7 sequencing, before <i>g17</i>                         |
| ACCTCCTTGAGAGTCCATCCGTGG                                                         | T7 sequencing, after <i>g17</i>                          |

---

**Table S4.** Summary of phage mutants generated in this study.

| T7 and BPP-1 tail fibre fusions | Gp17/g17 aa/bp | Mtd/ <i>mtd</i> aa/bp               | Phage mutants generated* | HR vectors used for phage mutants |
|---------------------------------|----------------|-------------------------------------|--------------------------|-----------------------------------|
| 1                               | 1 - 466/1-1398 | 171 – 382/513 – 1146                | phAG_1                   | pAG23                             |
| 2                               | 1 - 466/1-1398 | 55 – 382/165 – 1146                 | phAG_2                   | pAG24                             |
| 3                               | 1 - 466/1-1398 | 163 – 382/489 – 1146                | phAG_3                   | pAG25                             |
| 4                               | 1 - 466/1-1398 | 170 – 382/510 – 1146                | phAG_4                   | pAG26                             |
| 5                               | 1 - 466/1-1398 | 47 – 382/141 – 1146                 | phAG_5                   | pAG27                             |
| 6                               | 1 - 466/1-1398 | 52 – 382/156 – 1146                 | phAG_6                   | pAG28                             |
| 7                               | N/A            | N/A                                 | phAG_7**                 | pAG29                             |
| 8                               | 1 - 466/1-1398 | (Yep-phi/gp17)<br>485-569/1455-1707 | phPM                     | pAG32                             |

\*each mutant contains full sequence *trxA* after *mtd*/Yep-phi *g17* sequence insert.

\*\*phAG\_7 has *g17* replaced with full sequence of *trxA*.

**Table S5.** Efficiency of generating phage T7 mutants. *In trans* method tail fiber mutant efficiency represented as plaque PCR screening output.

| Phage Mutant | Plaques screened | Successful mutants (%) |
|--------------|------------------|------------------------|
| phAG_1       | 30               | 100                    |
| phAG_2       | 30               | 100                    |
| phAG_3       | 30               | 100                    |
| phAG_4       | 15               | 100                    |
| phAG_5       | 15               | 100                    |
| phAG_6       | 10               | 100                    |
| phAG_7       | 10               | 100                    |

**Table S6.** Single nucleotide variations detected in phage T7 mutants

| Phage  | SNV Position | Wild type | Mutant | Amino Acid change |
|--------|--------------|-----------|--------|-------------------|
| phAG_3 | 24876        | A         | G      | K->R              |
| phAG_4 | 742          | T         | C      | intergenic        |
| phAG_4 | 1897         | C         | .      | D->E              |
| phAG_4 | 1899         | A         | C      | Q->K              |

|        |       |   |   |      |
|--------|-------|---|---|------|
| phAG_4 | 1900  | G | A | Q->K |
| phAG_4 | 19560 | T | G | V->G |
| phPM   | 26041 | A | G | I->M |

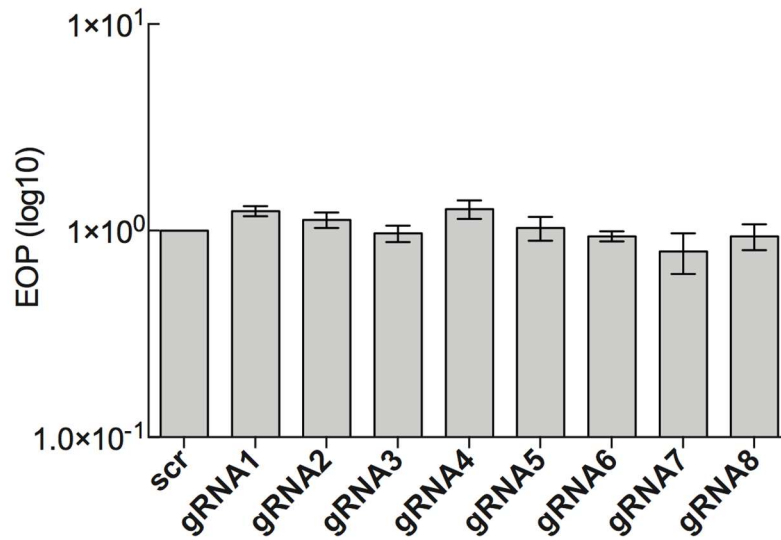

**Figure S1.** Efficiency of gRNAs only vectors of type I CRISPR-Cas system. Efficiency of plating for T7 against *E. coli* BW25113 containing type I CRISPR gRNAs only. The T7 efficiency of plating was determined with respect to a reference *E. coli* BW25113/pAG1 strain. EOP data is presented as the mean of three independent experiments. The concentration of the phage stock added 2x10<sup>9</sup> PFU/ml.



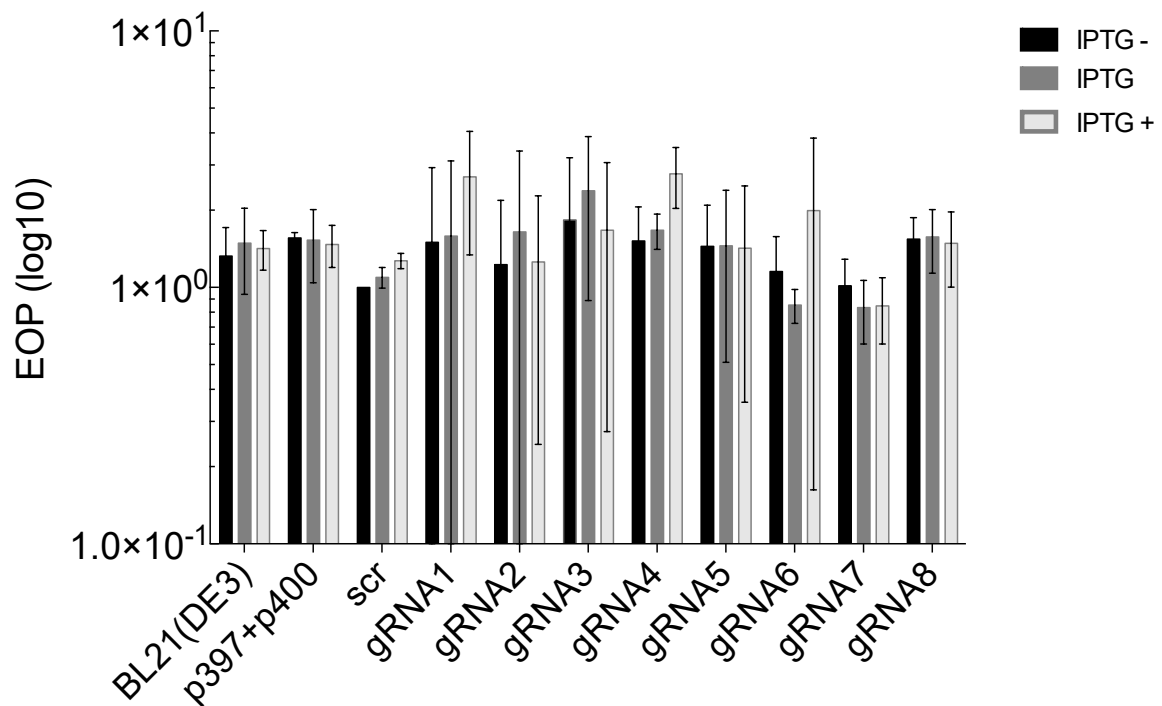

**Figure S2. Efficiency of type I CRISPR-Cas system with and without IPTG induction.** Efficiency of plating for T7 against *E. coli* BL21 (DE3) containing pWUR400 and pWUR397, and one of the nine gRNAs. The T7 efficiency of plating was determined with respect to a reference uninduced *E. coli* BL21(DE3) containing gRNA(scr). IPTG (-) group has no IPTG added. IPTG group had IPTG added only to the bacterial cultures. IPTG (+) group had IPTG added to the bacterial cultures as well as the top agar. EOP data is presented as the mean of three independent experiments. The concentration of the phage stock added  $10^{10}$  PFU/ml.

*E. coli* BL21(DE3) strain containing the Type I CRISPR-Cas plasmids were grown in liquid LB medium to  $OD_{600} = 0.3-0.4$ . Expression of the CRISPR-Cas genes was induced by the addition of IPTG to a final concentration of 0.1 mM and the cultures incubated at 37°C for 1 hour. For each of the induced cultures, 1 mL was combined with 8 mL of 0.7% LB agar, with and without 0.1 mM IPTG, and plated onto 1.5% LB agar plates before being further incubated at 37°C for 1 hour. T7 was used to perform spot assays followed by incubation at 37°C overnight to calculate efficiency of plating.

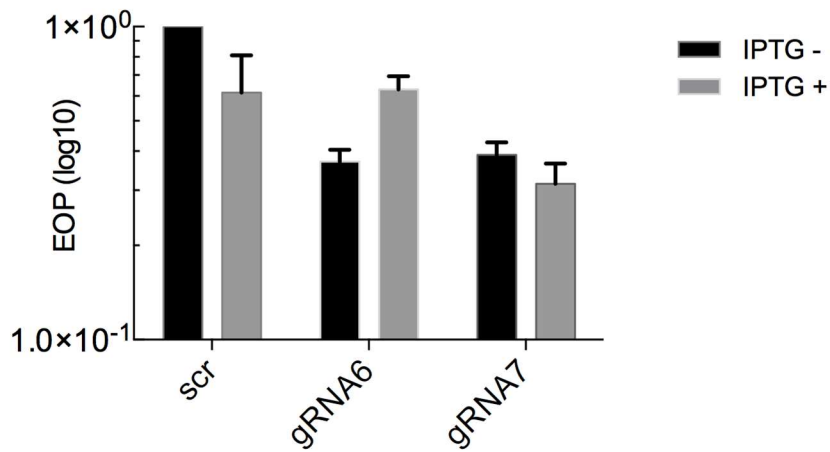

**Figure S3. Efficiency of type I CRISPR-Cas system with and without IPTG induction.** Efficiency of plating for T7 against *E. coli* BW25113 containing pWUR400 and pWUR397 and one of the three gRNA vectors pAG1 (gRNAscr), pAG7 (gRNA6) and pAG8 (gRNA7). The T7 efficiency of plating was determined with respect to a reference unduced *E. coli* BW25113/pAG1 strain. EOP data is presented as the mean of three independent experiments. The concentration of the phage stock added  $2 \times 10^9$  PFU/ml.

*E. coli* BL21-AI strain containing Type I CRISPR-Cas plasmids were grown in liquid LB medium to  $OD_{600} = 0.3-0.4$ . Expression of the CRISPR-Cas genes was induced by the addition of IPTG to a final concentration of 0.1 mM and the cultures incubated at 37°C for 1 hour. Each of the induced cultures were then used to carryout plaque assays, followed by incubation at 37°C overnight to calculate efficiency of plating.

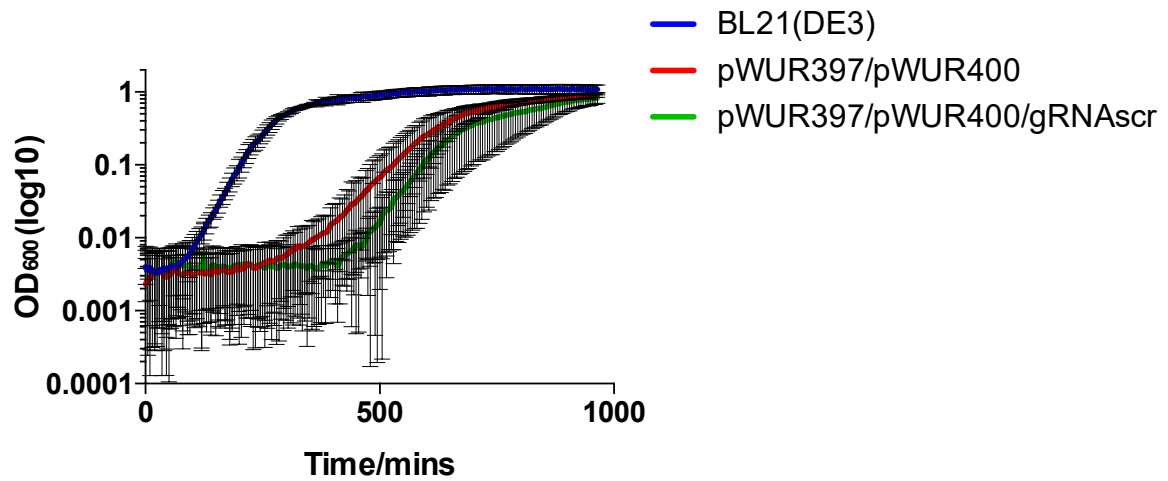

Figure S4. Growth of BL21(DE3) with and without type I CRISPR vectors. The data is presented for twenty-four technical replicates. The growth rate for each of the strains was determined. The growth rate for BL21(DE3) was 27.97 (+/- 0.46) mins. The growth rate for BL21(DE3) containing pWUR397/pWUR400 vectors was 38.92 (+/- 0.80) mins. The growth rate for BL21(DE3) containing pWUR397/pWUR400/gRNAscr was 96.14 (+/- 92.68) mins.

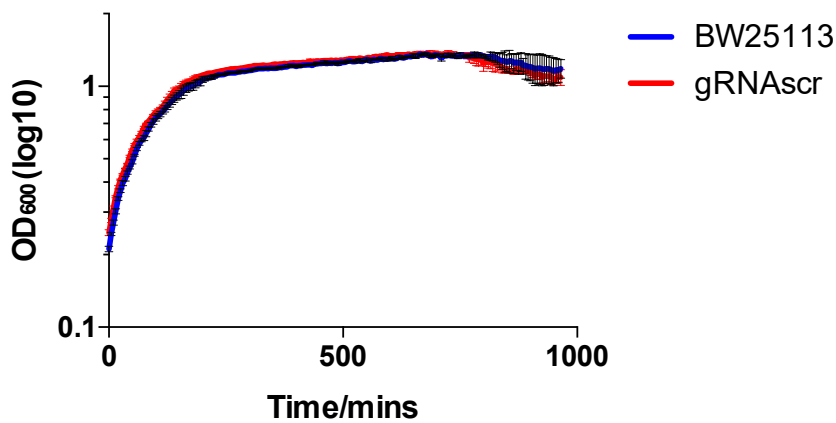

Figure S5. Growth of BW25113 with and without type II CRISPR vector. The data is presented for three technical replicates.

## Type I CRISPR

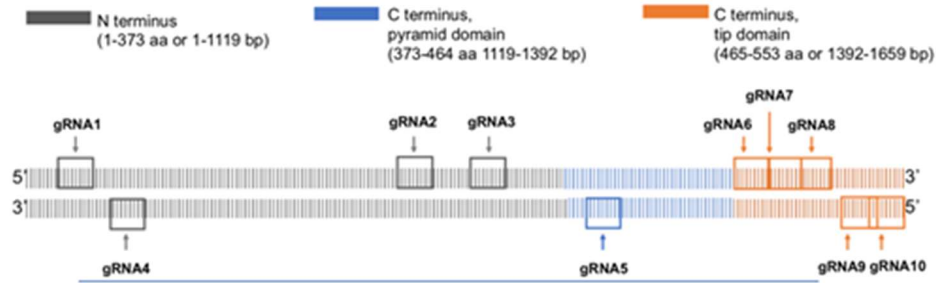

## Type II CRISPR

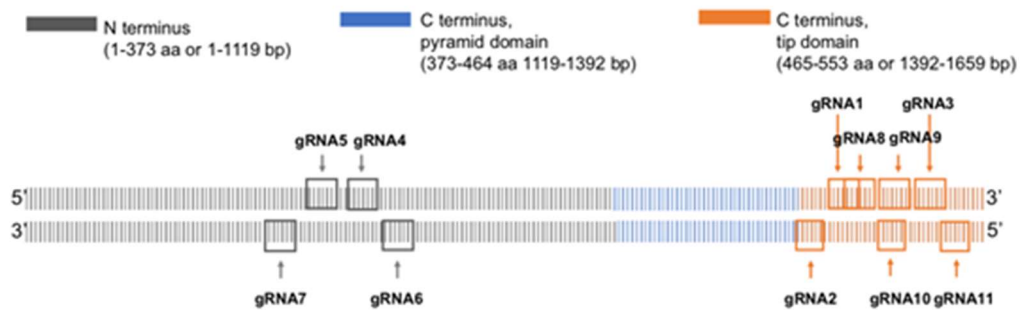

**Figure S6.** Representation of the distribution of gRNAs on *g17* designed for type I and type II CRISPRs.

(BPP-1) *mtd* g-block:

```

ATGAGTACCGCAGTCCAATTCCGAGGTGGAACGACCGCCCAGCACGCAACGTTACGGGCGCCGCC
CGTGAGATTACCGTCGATACCGACAAGAACACGGTTCGTTGTGCATGACGGTGCTACCGCTGGCGGCTT
CCCCCTGGCGCGGCACGATCTGGTGAACACGGCTTTCATCAAGGCCGACAAGTCGGCCGTCGCCTTCA
CGCGCACCGGCAACGCAACGGCCAGCATCAAGGCTGGCACCATCGTGGAGGTCAACGGCAAGCTGGT
GCAGTTCACCGCCGACACGGCCATCACCATGCCGGCGCTGACGGCCGGCACCGACTACGCCATCTAC
GTCTGCGACGATGGCACGGTGC GCGCCGATTCCAAC TTTTCGGCGCCCACTGGCTACACCTCGACCAC
GGCGCGCAAGGTGGGCGGCTTCCACTATGCGCCGGGAAGCAACGCTGCAGCGCAGGCTGGTGGAAAC
ACCACGGCGCAGATCAACGAATACAGCCTGTGGGACATCAAGTTTCGCCCGGCTGCGCTCGACCCGC
GCGGCATGACGCTGGTTGCCGGCGGCTTTGGGCAGACATCTATCTGCTAGGCGTCAACCACCTGACC
GATGGCACCAGCAAATACAACGTGACAATTGCAGATGGTAGTGATCACCTAAGAAATCTACCAAGT
TCGGTGGAGACGGCAGCGCGGCTACAGTGACGGAGCTTGGTACAAC TTCGCTGAGGTCATGACTCAT
CACGGTAAGCGCCTGCCTAACTACAACGAATTCCAGGCGCTGGCTTTCGGCACGACCGAGGCTACGTC
CAGCGGCGGCACCGACGTGCCACCACCGGCGTGAACGGCACGGGCGCAACGAGCGCGTGGAAACAT
TTACAGTCCAAGTGGGGCGTTGTGCAGGCGTCCGGTTGCTTGTGGACGTGGGGTAACGAGTTCGGCG

```

CCGTGAATGGCGCATCCGAATACACGGCCAACACTGGCGGCAGAGGATCGGTGTACGCCAGCCCGC  
TGCTGCGCTATTCGGCGGCGCCTGGAACGGCAGCTCGCTCTCGGGTTCTCGCGCTGCGCTCTGGTACAG  
CGGGCCGTCGTTCTCGTTCGCGTTCCTCGGGGCGCGCGGCGTCTGTGACCACCTGATTCTTGAGTAGCG  
GGGCCGAAAGGCCCGCCAAGGCAACCGTACTCGAACCCTAGCCCGCTTATCGGGCGGCTAGGG  
GTTTTTTGT

HR1-*trxA*-HR2 g-block:

TGTTAACTTGAGGGAGCGTAGGAAATAATACGACTCACTATAGGGAGAGGGCGAAATAATCTTCTCCCT  
GTAGTCTCTTAGATTTACTTTAAGGAGGTCAAATGAGCGATAAAATCATTACCTGACCGATGACTCTT  
TTGATACCGACGTGCTGAAAGCTGATGGTGCAATTCTGGTTGATTTCTGGGCAGAGTGGTGCGGCCCTT  
GCAAAATGATCGCTCCAATCCTGGACGAAATTGCGGACGAATATCAGGGTAAGCTGACTGTGGCCAA  
ACTGAACATTGACCAGAACCCTGGCACCGCACCGAAATACGGTATCCGTGGCATCCCAACTCTGCTGC  
TGTTCAAAAACGGTGAAGTGGCAGCAACCAAGTAGGCGCTCTGTCTAAAGGCCAACTGAAAGAGTT  
CCTGGACGCCAACCTGGCTTAATGATTGGTAAATCACAAGGAAAGACGTGTAGTCCACGGATGGACT  
CTCAAGGAGGTACAAGGTGCTATCATTAGACTTTAACAACGAATTGATTTGA

(Yep-phi) *g17* g-block:

GCCGTTGTGGCCACTGATGGTAATATTCAAGGTAAGTGGGGAGGTAAATGGCTGGATGCTTACC  
TACGTGACAGCTTCGTTGCGAAGAGCTCTGGTTGGACTGAGGTATGGCAAGGCTCTGCTGGTGGTGGT  
GTTTCAGTAAGCCTCTCACAGGATGTCCGCTGGAGAACTATCTGGATTCTAGCTAATAATGGCATGTGT  
TCTGTTTCAGATTGGAGCTGATGCTACTTACTTCATGGTGGTTATGGGTGGTTGGTTGAAGTTCACAATTT  
CCAACAACGGGAGAACTTTCCGTAACGACCAAGATCGAAATACAGTACCTGAGCAAATCTTAGTTTCG  
AAACTAATAATTGGTAAATCACAAGGAAAGACGTGTAGTCCACGGATGGACTCTCAAGGAGGTACAA  
GGTGCTATCATTAGACTTTAACAACGAATTGATA

**Figure S7.** Sequences of g-blocks used in this study.

## References

1. Baba, T.; Ara, T.; Hasegawa, M.; Takai, Y.; Okumura, Y.; Baba, M.; Datsenko, K.A.; Tomita, M.; Wanner, B.L.; Mori, H. Construction of *Escherichia coli* K-12 in-frame, single-gene knockout mutants: The Keio collection. *Mol. Syst. Biol.* **2006**, *2*, doi:10.1038/msb4100050.
2. Blattner, F.R.; Plunkett, G.; Bloch, C.A.; Perna, N.T.; Burland, V.; Riley, M.; Collado-Vides, J.; Glasner, J.D.; Rode, C.K.; Mayhew, G.F.; et al. The complete genome sequence of *Escherichia coli* K-12. *Science* **1997**, *277*, 1453–1462.
3. Invitrogen BL2-AI™ Competent Cells—maximum expression with tightest regulation. *Invitrogen*. Carlsbad, CA, USA, **2002**. Accessed on June 14, 2017. [Online]. Available: [http://tools.thermofisher.com/content/sfs/brochures/712\\_021252\\_BL21AI\\_bro.pdf](http://tools.thermofisher.com/content/sfs/brochures/712_021252_BL21AI_bro.pdf)
4. Studier, F.W.; Daegelen, P.; Lenski, R.E.; Maslov, S.; Kim, J.F. Understanding the Differences between Genome Sequences of *Escherichia coli* B Strains REL606 and BL21(DE3) and Comparison of the *E. coli* B and K-12 Genomes. *J. Mol. Biol.* **2009**, *394*, 653–680.
5. Jeong, H.; Barbe, V.; Lee, C.H.; Vallenet, D.; Yu, D.S.; Choi, S.H.; Couloux, A.; Lee, S.W.; Yoon, S.H.; Cattolico, L.; et al. Genome Sequences of *Escherichia coli* B strains REL606 and BL21(DE3). *J. Mol. Biol.* **2009**, *394*, 644–652.
6. Brouns, S.J.J.; Jore, M.M.; Lundgren, M.; Westra, E.R.; Slijkhuis, R.J.H.; Snijders, A.P.L.; Dickman, M.J.; Makarova, K.S.; Koonin, E.V.; van der Oost, J. Small CRISPR RNAs guide antiviral defense in prokaryotes. *Science* **2008**, *321*, 960–964.
